# Supplementary figures and images for: Rapid quantitative analysis of petroleum coke properties by laser-induced breakdown spectroscopy combined with random forest based on a variable selection strategy
Source: Royal Society of Chemistry journal article supplement (doi:10.1039/d4ra02873b), 2024-01-01

## Supporting information

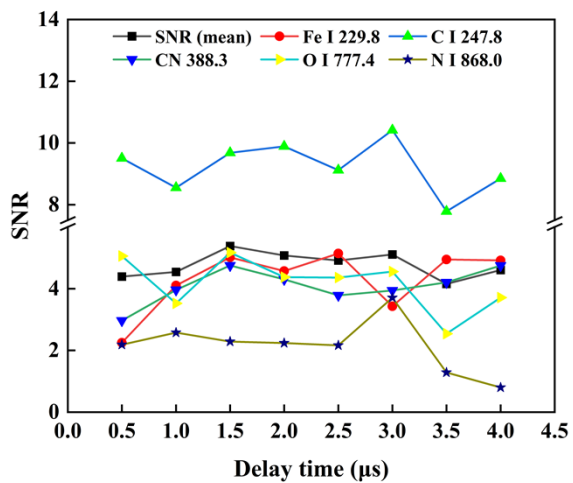

**Fig. S1** The optimization process of delay time

Supplement: d4ra02873b1.pdf [file d4ra02873b1.pdf]
